# Supplementary material for: All-Cause NO2-Attributable Mortality Burden and Associated Racial and Ethnic Disparities in the United States
Source: PubMed Central journal article supplement — Environ Sci Technol Lett. 2023 Nov 7;10(12):1159–64. doi: 10.1021/acs.estlett.3c00500 (PMC10720462; doi:10.1021/acs.estlett.3c00500), 2023-11-07
Supplement: ez3c00500_si_001.pdf [file ez3c00500_si_001.pdf]

## Supporting Information

**Title:** All-cause NO<sub>2</sub>-attributable mortality burden and associated racial and ethnic disparities in the U.S.

Sara F Camilleri<sup>1\*</sup>, Gaige Hunter Kerr<sup>2</sup>, Susan C Anenberg<sup>2</sup>, Daniel E Horton<sup>1,3</sup>

<sup>1</sup>Department of Earth and Planetary Sciences, Northwestern University, Evanston, IL, USA

<sup>2</sup>Department of Environmental and Occupational Health, The George Washington University, Washington, DC, USA

<sup>3</sup>Trienens Institute for Sustainability and Energy, Northwestern University, Evanston, IL, USA

\*Corresponding author: Sara F Camilleri.

Email: [sara.camilleri@northwestern.edu](mailto:sara.camilleri@northwestern.edu)

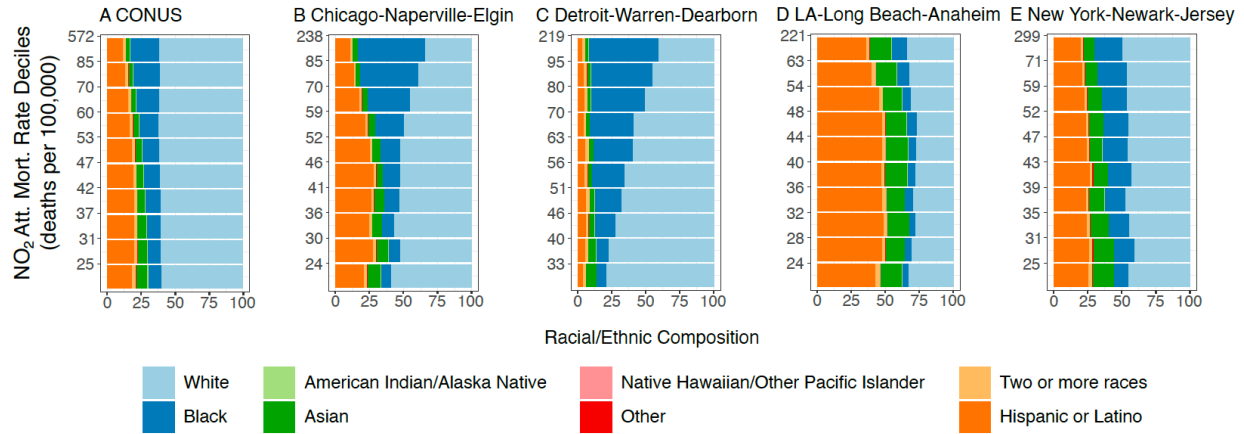

**Figure S1: Racial and Ethnic Disparities.** The racial and ethnic composition (in %) of the population for deciles of NO<sub>2</sub>-attributable mortality rates following reductions in NO<sub>2</sub> concentrations to the WHO Air Quality Guidelines in all tracts exceeding this standard for (A) the contiguous U.S. and (B-F) across selected MSAs (in deaths per 100,000 per year). All race groups except Hispanic or Latino, include only those identifying as non-Hispanic.
